# Supplementary material for: Physicochemical characterizations of novel dicyanamide-based ionic liquids applied as electrolytes for supercapacitors
Source: Royal Society of Chemistry journal article supplement (doi:10.1039/c8ra05820b), 2018-01-01

## Electronic Supplementary Informations

### Physicochemical characterizations of novel dicyanamide -based ionic liquids applied as electrolytes for supercapacitors.

Ramzi Zarrougui<sup>a,\*</sup>, Rahma Hachicha<sup>a,b,c</sup>, Refka Rjab<sup>a,b</sup>, Sabri Messaoudi<sup>d</sup> and Ouassim Ghodbane<sup>a</sup>

<sup>a</sup>Laboratoire des Matériaux Utiles (LR10INRAP01), Institut national de recherche et d'analyse physico-chimique, Biotechpole Sidi Thabet, 2020 Ariana, Tunisia.

<sup>b</sup>Université de Tunis El Manar, Campus Universitaire Farhat Hached Tunis, B.P. n° 94, Rommana 1068, Tunisia

<sup>c</sup>Institut Charles Gerhardt, Université de Montpellier, Campus Triolet, 34095 Montpellier Cedex 5, France.

<sup>d</sup>Faculté des Sciences de Bizerte, 7021 Jarzouna, Tunisia.

\* Corresponding author: ramzi.zarrougui@gmail.com; phone: (216) 71 537 659.

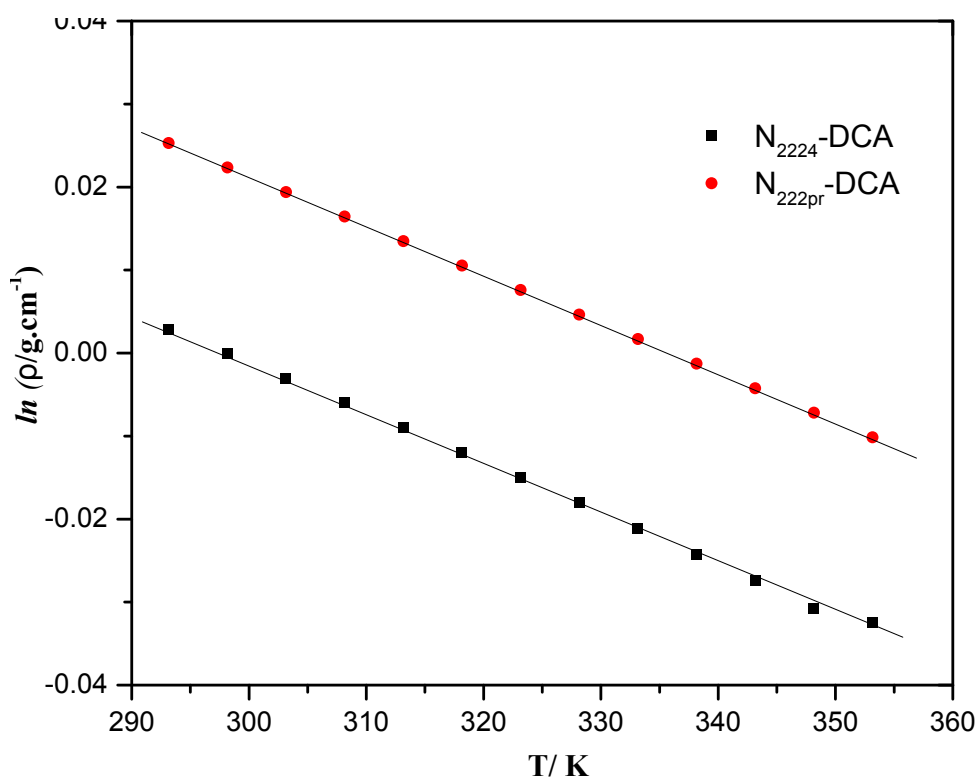

Figure S1. Variation of  $\ln\rho$  of ILs with the temperature range 298 to 353K.

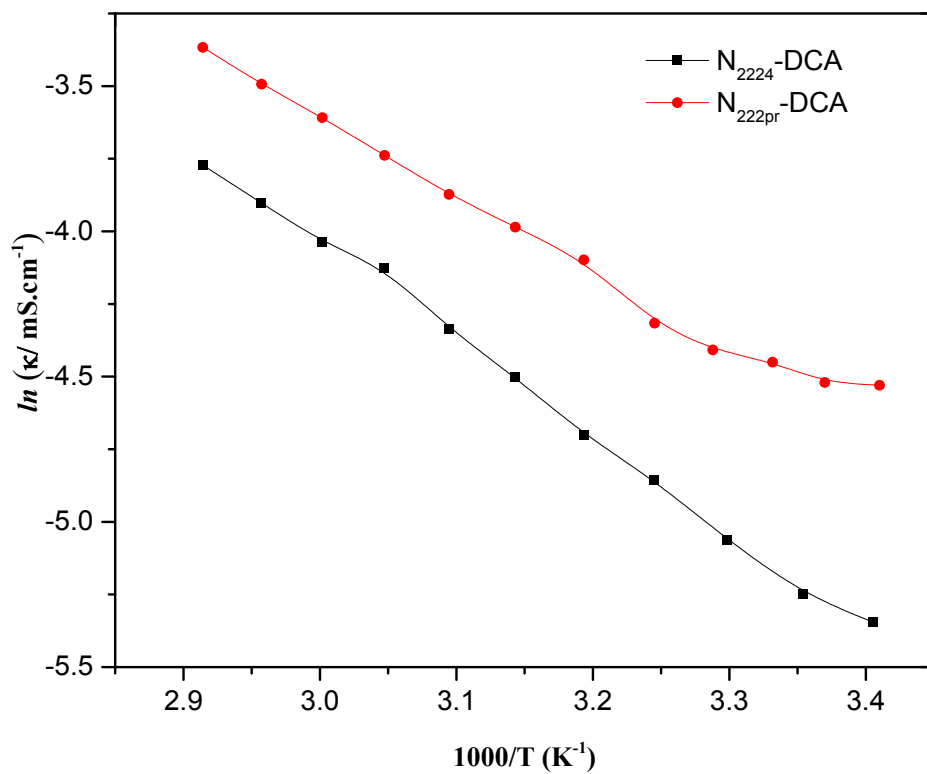

Figure S2. Plot of  $\ln \kappa$  against  $1000/T$ , from the temperature range 298 to 353K.

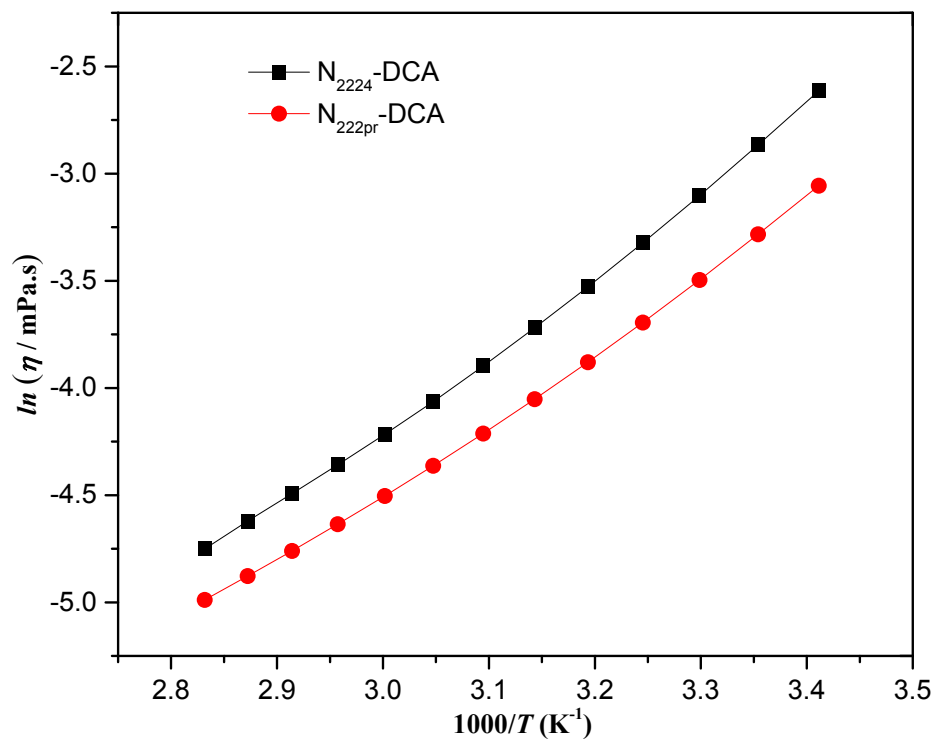

Figure S3: Plot of  $\ln \eta$  against  $1000/T$ , from the temperature range 298 to 353K.

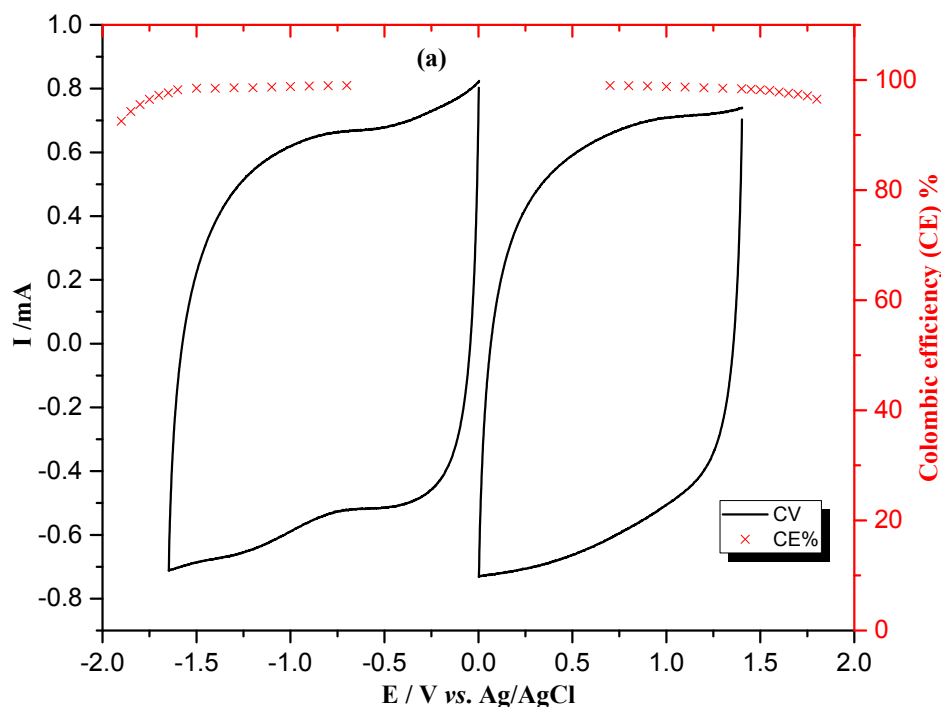

Figure S4-a: Maximum operating voltage determination for N<sub>2224</sub>-DCA IL, using cyclic voltammetry. Coulombic efficiency (CE%) of cells used in the determination of anodic/cathodic limits. Cells cycled from OCP to 0.7 V, then in 0.1 or 0.05V increments to 2.0 V. Limit defined by the potential at which 98.5% efficiency was observed. Fresh cells used to determine the cathodic limit, cycling from OCP to - 0.70 V initially and in 0.1 or 0.05 V increments to - 2 V.

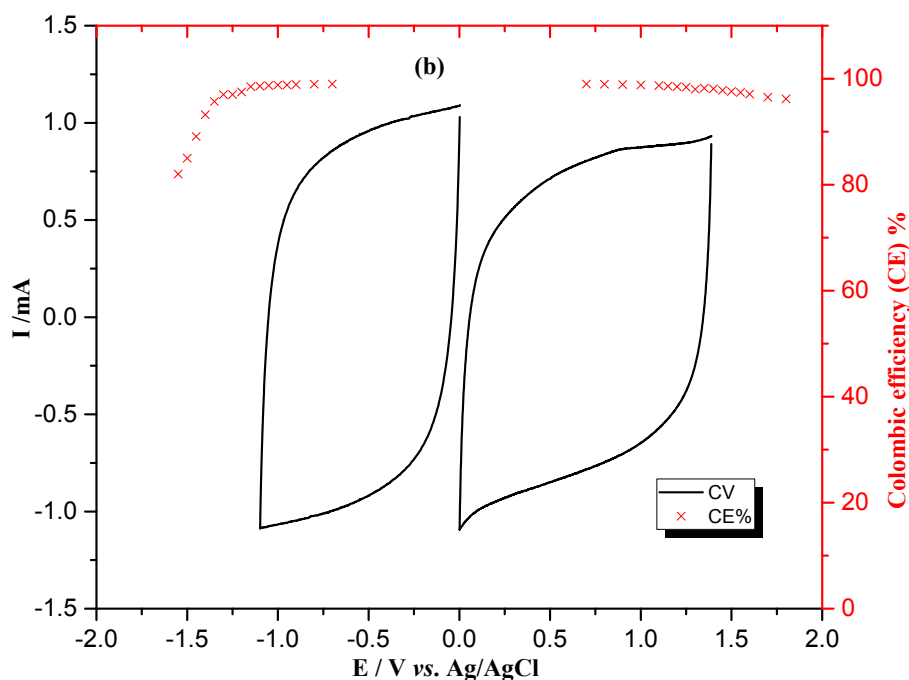

Figure S4-b: Maximum operating voltage determination for N<sub>222pr</sub>-DCA IL, using cyclic voltammetry. Coulombic efficiency (CE%) of cells used in the determination of anodic/cathodic limits. Cells cycled from OCP to 0.7 V, then in 0.1 or 0.05V increments to 2.0 V. Limit defined by the potential at which 98.5% efficiency was observed. Fresh cells used to determine the cathodic limit, cycling from OCP to - 0.70 V initially and in 0.1 or 0.05 V increments to - 2.

# $^1\text{H}$ NMR Spectra of ILs

## Triethyl-butylammonium dicyanamide $\text{N}_{2224}\text{-DCA}$

$^1\text{H}$  NMR (500 MHz, Chloroform-*d*)  $\delta$  = 3.63 (t,  $J$  = 5.1 Hz, 2H), 3.21 (qd,  $J$  = 6.0, 1.1 Hz, 6H), 1.57 – 1.47 (m, 2H), 1.46 – 1.33 (m, 2H), 1.27 (t,  $J$  = 6.0 Hz, 9H), 0.96 (t,  $J$  = 7.6 Hz, 3H).

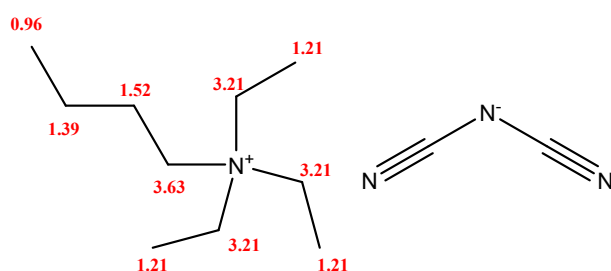

## Triethyl-propargylammonium dicyanamide $\text{N}_{222\text{pr}}\text{-DCA}$

$^1\text{H}$  NMR (500 MHz, Chloroform-*d*)  $\delta$  = 3.91 (d,  $J$  = 2.9 Hz, 2H), 3.26 (q,  $J$  = 6.0 Hz, 6H), 2.38 (t,  $J$  = 2.9 Hz, 1H), 1.27 (t,  $J$  = 6.0 Hz, 9H).

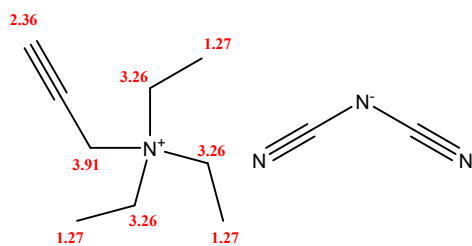

Triethyl-butylammonium dicyanamide N<sub>2224</sub>-DCA

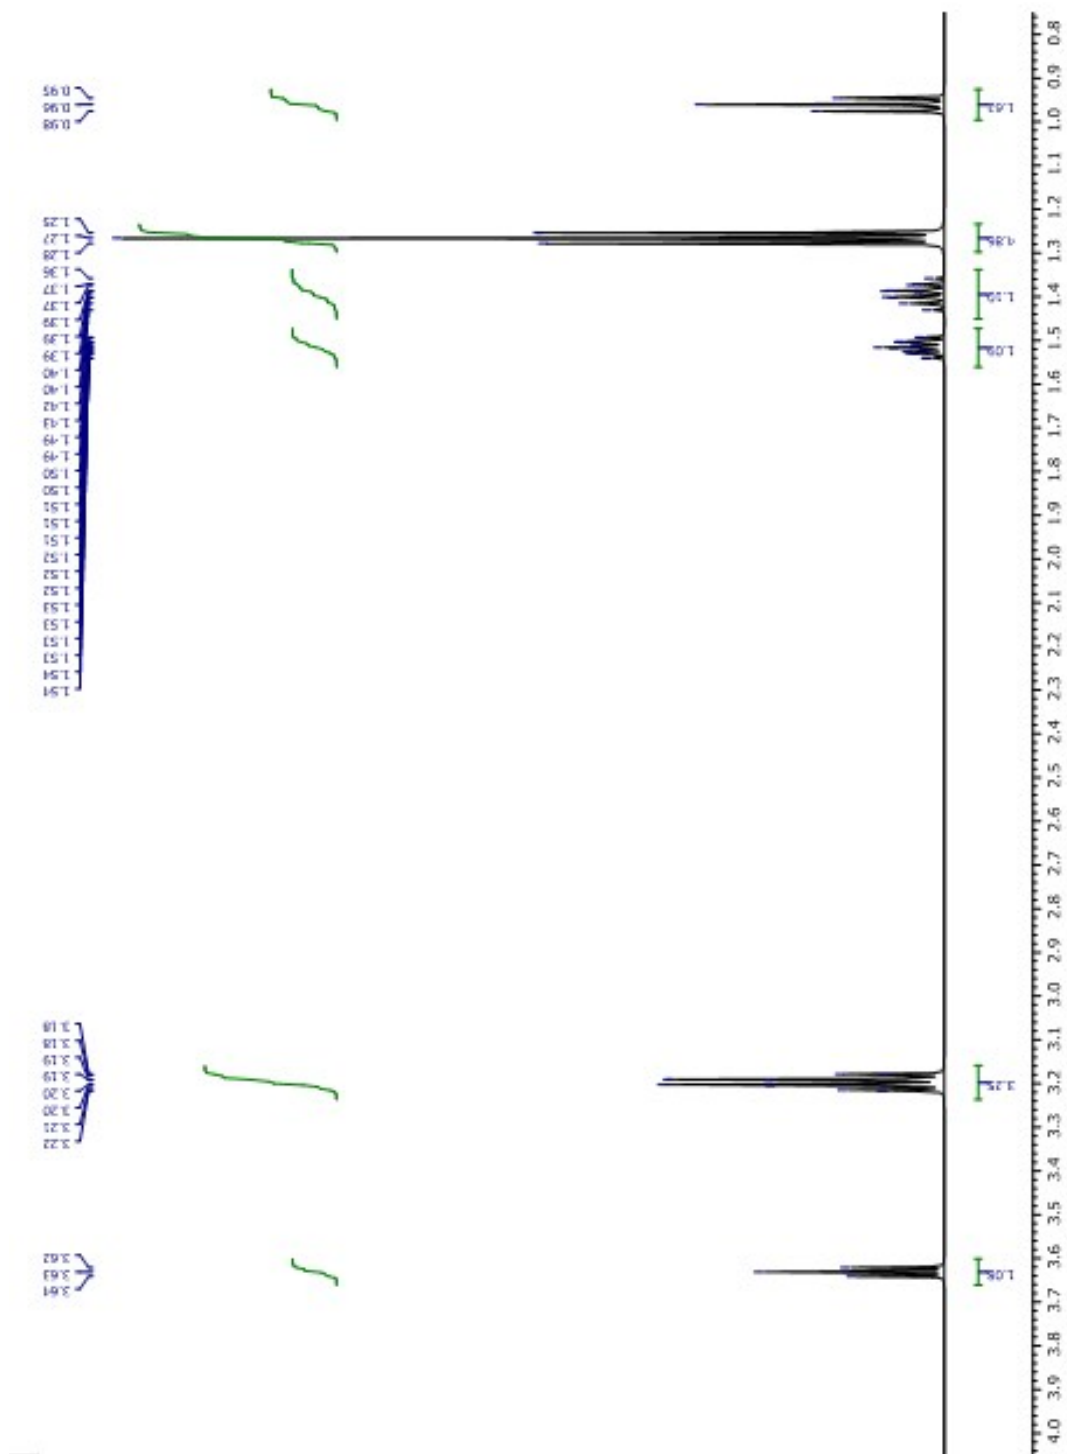

Triethyl-propargylammonium dicyanamide N<sub>222pr</sub>-DCA

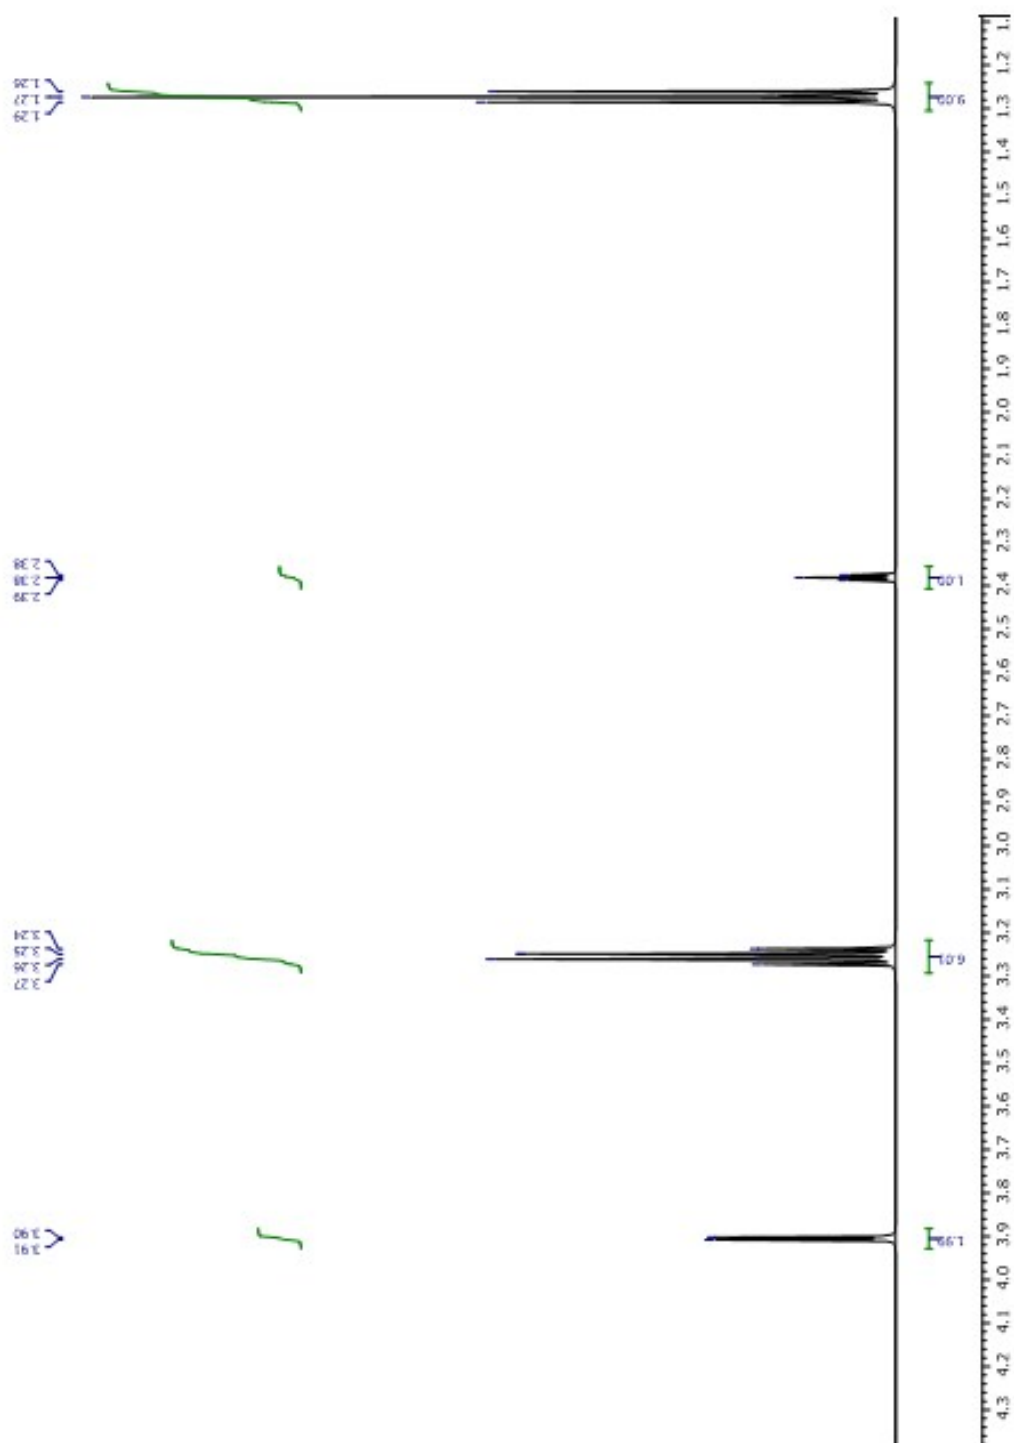

Supplement: c8ra05820b1.pdf [file c8ra05820b1.pdf]
